# Supplementary material for: Structure of SARS-CoV-2 ORF8, a rapidly evolving immune evasion protein
Source: PubMed Central journal article supplement (PMC7812859; doi:10.1073/pnas.2021785118), 2020-12-23
Supplement: pnas.2021785118.sapp.pdf [file pnas.2021785118.sapp.pdf]

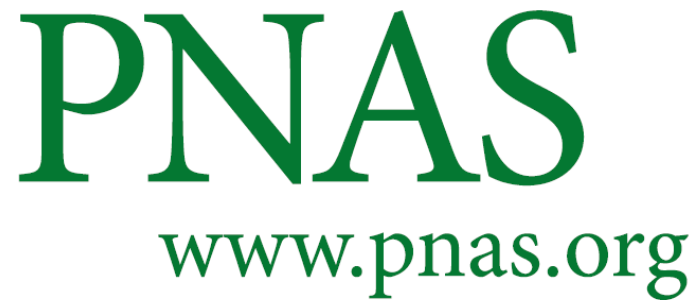

**Supplementary Information for**  
Structure of SARS-CoV-2 ORF8, a rapidly evolving immune  
evasion protein

Thomas G. Flower, Cosmo Z. Buffalo, Richard M. Hooy, Marc Allaire, Xuefeng Ren and James H. Hurley

James H. Hurley  
Email: [jimhurley@berkeley.edu](mailto:jimhurley@berkeley.edu)

**This PDF file includes:**

Table S1

**Table S1. Data collection and refinement statistics**

|                                                         | SARS-CoV-2 ORF8<br>(PDB 7JTL)       |                        |
|---------------------------------------------------------|-------------------------------------|------------------------|
| <b>Data collection</b>                                  |                                     |                        |
|                                                         | Native                              | SeMet                  |
| Space group                                             | <i>P4<sub>1</sub>2<sub>1</sub>2</i> | <i>C2<sub>1</sub></i>  |
| Cell dimensions                                         |                                     |                        |
| <i>a, b, c</i> (Å)                                      | 44.3 44.3 264.1                     | 69.5 69.5 139.6        |
| $\alpha, \beta, \gamma$ (°)                             | 90, 90, 90                          | 90, 104, 90            |
| Resolution (Å)                                          | 43.65-2.04 (2.11-2.04)              | 48.44-2.98 (3.16-2.98) |
| <i>R</i> <sub>pim</sub>                                 | 0.032 (0.555)                       | 0.037 (0.600)          |
| <i>I</i> / $\sigma$ <i>I</i>                            | 14.92 (1.20)                        | 12.3 (1.7)             |
| Completeness (%)                                        | 97.8 (90.2)                         | 99.4 (99.4)            |
| Redundancy                                              | 10.0 (7.6)                          | 5.6 (5.9)              |
| <b>Refinement</b>                                       |                                     |                        |
| Resolution (Å)                                          | 43.65-2.04                          |                        |
| No. reflections                                         | 17005 (1399)                        |                        |
| <i>R</i> <sub>work</sub> / <i>R</i> <sub>free</sub> (%) | 22.0 (35.2) / 26.4 (38.4)           |                        |
| No. atoms                                               |                                     |                        |
| Protein                                                 | 1609                                |                        |
| Water                                                   | 201                                 |                        |
| <i>B</i> -factors                                       |                                     |                        |
| Protein                                                 | 45.4                                |                        |
| Water                                                   | 44.3                                |                        |
| R.m.s. deviations                                       |                                     |                        |
| Bond lengths (Å)                                        | 0.008                               |                        |
| Bond angles (°)                                         | 1.00                                |                        |

Values in parentheses are for highest-resolution shell. Redundancy for SeMet data is shown for I<sup>+</sup> and I<sup>-</sup> separately
